# Supplementary material
Source: PubMed Central journal article supplement (PMC4789144)
Supplement: NIHMS717242-supplement-01.pdf [file NIHMS717242-supplement-01.pdf]

Supplemental Table 1: 25 patients with food-related AD who developed immediate reactions without a history of immediate reactions

| Pt # | Food causing immediate reaction | Reaction    | Initial SPT (mm)                      | Initial sIgE (kU/l)               | Follow-up sIgE (kU/l) | Length of time until reaction | Food triggering AD      |
|------|---------------------------------|-------------|---------------------------------------|-----------------------------------|-----------------------|-------------------------------|-------------------------|
| 12   | PN                              | Cutaneous   | Not done                              | 9.27                              | 3.88                  | 2y 9m 26d                     | W, Barley               |
| 31   | PN                              | Cutaneous   | Not done                              | Not done                          | Not done              | 4y 8m 5d                      | CM, S                   |
| 31   | CM                              | Cutaneous   | Not done                              | 0.51                              | 5.23                  | 9m 29d                        | CM, S                   |
| 39   | Asparagus                       | Cutaneous   | Negative                              | Not done                          | 1.81                  | 2y 4m 28d                     | W, Corn                 |
| 49   | CM                              | Anaphylaxis | Positive (8 mm wheal, 10 mm erythema) | 42                                | 99.7                  | 1y 6m 8d                      | S                       |
| 52   | PN                              | Anaphylaxis | Positive (5 mm wheal, 15 mm erythema) | 8.24                              | Not done              | 2y 10d                        | PN, TN                  |
| 58   | E                               | Cutaneous   | Positive (7mm wheal, 12 mm erythema)  | 10.6                              | 8.83                  | 1y 1m 4d                      | E, CM, PN               |
| 69   | PN                              | Anaphylaxis | Not done                              | Not done                          | 12.3                  | 1y 6d                         | CM                      |
| 69   | CM                              | Cutaneous   | Positive (3mm wheal, 6mm erythema)    | 5.87                              | 6.07                  | 1y 6d                         | CM                      |
| 75   | E                               | Cutaneous   | Positive (performed at OSH)           | 14.2                              | 4.21                  | 2y 4m 24d                     | CM                      |
| 81   | Soy                             | Anaphylaxis | Positive (5 mm wheal, 10 mm erythema) | Not done                          | 1.59                  | 10m 1d                        | E, CM, PN, TN, F, SF, S |
| 84   | CM                              | Anaphylaxis | Negative                              | Not done                          | 17.6                  | 2m 28d                        | CM, E                   |
| 93   | CM                              | Cutaneous   | Negative                              | Not done (negative at OSH)        | 0.26                  | 6m 5d                         | CM                      |
| 98   | PN                              | Cutaneous   | Positive (3mm wheal, 7mm erythema)    | Not done                          | Not done              | 1y 6m 2d                      | PN, E                   |
| 100  | CM                              | Anaphylaxis | Positive (5mm wheal, 8mm erythema)    | 3.03                              | 83                    | 1y 4m 17d                     | CM, W, Coconut          |
| 100  | Banana                          | Cutaneous   | Not done                              | Not done                          | 0.28                  | 2y 4m 30d                     | CM, W, Coconut          |
| 103  | Sweet potato                    | Cutaneous   | Not done                              | Not done                          | 5.63                  | 1y 6m 17d                     | Rice cereal             |
| 118  | CM                              | Anaphylaxis | Positive (9 mm wheal, 16 mm erythema) | 44.3                              | >100                  | 11m 3d                        | TN                      |
| 118  | Apple                           | Cutaneous   | Not done                              | Not done                          | 1.45                  | 1y 4m 4d                      | TN                      |
| 124  | CM                              | Cutaneous   | Not done                              | 0.12                              | Not done              | 5m 22d                        | CM                      |
| 125  | E                               | Cutaneous   | Positive (7mm wheal, 9 mm erythema)   | 7.69                              | Not done              | 2m 24d                        | E                       |
| 187  | CM                              | Cutaneous   | Not done                              | 2.04                              | 21.3                  | 10m 28d                       | PN, CM                  |
| 208  | E                               | Anaphylaxis | Positive (8mm wheal, 24 mm erythema)  | Not done (Previously 2.77 at PMD) | 0.68                  | 5m 18d                        | E, W                    |
| 220  | E                               | Cutaneous   | Negative                              | Not done                          | Not done              | 1y 18d                        | CM                      |
| 220  | Rice                            | Cutaneous   | Not done                              | Not done                          | <0.1                  | 4m 17d                        | CM                      |
| 226  | TN (pecans)                     | Cutaneous   | Not done                              | Not done                          | 13.4                  | 1y 5m 25d                     | CM                      |

|     |            |             |                                          |          |      |            |       |
|-----|------------|-------------|------------------------------------------|----------|------|------------|-------|
| 272 | E          | Cutaneous   | Positive (4+; wheal size not documented) | Not done | 53.7 | 6m 20d     | S, E  |
| 276 | E          | Anaphylaxis | Positive (5mm wheal, 13 mm erythema)     | 2.02     | 0.26 | 2y 1d      | E     |
| 280 | W          | Cutaneous   | Not done                                 | 1.07     | 1.64 | 1y 10m 16d | CM, W |
| 288 | Pinto Bean | Anaphylaxis | Not done                                 | Not done | 11   | 1y 6m 9d   | E     |
| 288 | Chicken    | Cutaneous   | Not done                                 | 0.394    | 10.1 | 1y 9m 5d   | E     |

**Key:**

CM: Cow's milk

E: Egg

TN: Tree nuts

W: Wheat

PN: peanut
